# Supplementary material for: RETRACTED: Targeting posttranslational modifications of RIOK1 inhibits the progression of colorectal and gastric cancers
Source: eLife journal article supplement (doi:10.7554/elife.29511), 2018-01-31
Supplement: supp [file elife_poa_e29511_Supplementary_File_1.docx]

**Supplementary Table 1**

Univariate analysis and multivariate analysis between RioK1 expresssion and Clinicopathologic Features of CRC Patients (n=104)

| **Variables** | **Univariate analysis** | **Multivariate analysis** | |
| --- | --- | --- | --- |
| ***P*** | **HR (95% CI)** | ***P*** |
| **Age** |  |  |  |
| <65 | 0.129 |  |  |
| >65 |  |
| **Gender** |  |  |  |
| Male | 0.510 |  |  |
| Female |  |
| **Depth** |  |  |  |
| T1/T2/T3 | ***0.030*** | 2.449 | 0.054 |
| T4 | (0.986-4.983) |
| **Lymph node metastasis** |  |  |  |
| Negative | ***0.001*** | 4.876 | ***0.001*** |
| Positive | (2.386-8.820) |
| **Venous invasion** |  |  |  |
| Negative | ***0.034*** | 2.262 | 0.146 |
| Positive | (0.753-4.796) |
| **CEA** |  |  |  |
| <5 | ***0.008*** | 3.177 | ***0.019*** |
| >5 | (1.212-6.329) |
| **Lymphatic invasion** |  |  |  |
| Negative | ***0.022*** | 1.548 | 0.458 |
| Positive | (0.488-4.909) |
| **RIOK1** |  |  |  |
| Low expression | ***0.006*** | 4.521 | ***0.003*** |
| High expression | (1.648-8.402) |
