# Supplementary material for: RETRACTED: Targeting posttranslational modifications of RIOK1 inhibits the progression of colorectal and gastric cancers
Source: eLife journal article supplement (doi:10.7554/elife.29511), 2018-01-31
Supplement: supp [file elife_poa_e29511_Supplementary_File_2.doc]

**Supplementary Table 2**

Identification of RioK1-interacting proteins via MS

| Swiss-Prot  accession no. | Gene Symbol | Protein name | No. of unique  peptides matched | % Sequence identified  by MS/MS data | Protein mascot score |
| --- | --- | --- | --- | --- | --- |
| Q969H0 | FBXW7 | F-box/WD repeat-containing protein 7 | 9 | 29 | 192 |
| Q9NRD1 | FBXO6 | F-box only protein 6 | 6 | 23 | 179 |
| Q13547 | HDAC1 | Histone deacetylase 1 | 7 | 18 | 168 |
| P61978 | HNRNPK | Heterogenerous nuclear protein K | 5 | 25 | 154 |
| O14744 | PRMT5 | Protein arginine N-methyltransferase 5 | 6 | 21 | 143 |
| Q8WTS6 | SETD7 | Histone-lysine N-methyltransferase | 7 | 19 | 141 |
| Q13573 | SNW1 | SNW domain-containing protein 1 | 7 | 19 | 127 |
| P61313 | RPL15 | 60S ribosomal protein L15 | 5 | 17 | 121 |
| Q9ULK4 | MED23 | Mediator of RNA polymerase II transcription subunit 23 | 4 | 20 | 107 |
| P11441 | UBL4A | Ubiquitin-like protein 4A | 4 | 15 | 95 |
| P00533 | EGFR | Epidermal growth factor receptor | 3 | 17 | 87 |
| [Q15717](http://www.uniprot.org/uniprot/Q15717) | ELAVL1 | ELAV-like protein 1 | 4 | 18 | 76 |
| O60341 | LSD1 | Lysine-specific histone demethylase 1A | 5 | 20 | 69 |
| P61956 | SUMO2 | Small ubiquitin-related modifier 2 | 3 | 16 | 51 |
